# Supplementary material for: HRRTLE (High Resolution Runoff and Transmission Loss Estimator): a novel tool for mapping connectivity of runoff in ephemeral stream networks to aid the siting of water harvesting structures
Source: Copernicus journal article supplement (doi:10.5194/hess-2024-97), 2024-04-12
Supplement: Supplementary file 1 [file Table S1 baseflow.docx]

Table S1. Baseflow of each catchment calculated using PART software.

| **catchment code** | **baseflow (%)** | **daily runoff data range (years)** |
| --- | --- | --- |
| aufr | 3.8 | 1982–2019 |
| zade | 7.1 | 1993–2005 |
| zahh | 9.3 | 1993–2005 |
| aunp | 9.8 | 1968–2018 |
| zabt | 14.1 | 2003–2011 |
| zat | 14.1 | 1989–1994 |
| ault | 14.2 | 1979–2018 |
| brpr | 20.2 | 1973–2013 |
| zao | 20.3 | 1973–2020 |
| augd | 21.7 | 1997–2020 |
| zakk | 38.2 | 1999–2013 |
| aums | 39.3 | 1969–2018 |
| zasd | 39.7 | 2009–2021 |
| zamb | 41.1 | 1984–2021 |
| zaan | 43.2 | 1983–1998 |
| zadk | 47.6 | 1995–2014 |
| zahe | 51.0 | 2015–2021 |
| usnp | 53.3 | 1939–2021 |
| ausj | 56.0 | 1957–2018 |
| brmn | 59.4 | 1985–2019 |
| aumf | 63.7 | 1952–2018 |
| zaw | 64.1 | 1987–2001 |
| usmh | 64.9 | 1936–2021 |
| zaos | 66.5 | 1999–2020 |
| ussc | 70.0 | 1930–2020 |
| zamk | 74.6 | 2004–2021 |
| zaul | 75.0 | 1997–2015 |
| ilob | 87.5 | 1991–2018 |

Software: U.S. Geological Survey (USGS): PART: A computerized method of base-flow-record estimation, https://water.usgs.gov/software/lists/groundwater, 2016.
