# Supplementary material for: HRRTLE (High Resolution Runoff and Transmission Loss Estimator): a novel tool for mapping connectivity of runoff in ephemeral stream networks to aid the siting of water harvesting structures
Source: Copernicus journal article supplement (doi:10.5194/hess-2024-97), 2024-04-12
Supplement: Supplementary file 2 [file Table S2 monthly observed runoff.docx]

Table S2. Mean monthly observed runoff (km3 mth-1) for test catchments, with the maximum discharge month in bold.
