# Supplementary material for: HRRTLE (High Resolution Runoff and Transmission Loss Estimator): a novel tool for mapping connectivity of runoff in ephemeral stream networks to aid the siting of water harvesting structures
Source: Copernicus journal article supplement (doi:10.5194/hess-2024-97), 2024-04-12
Supplement: Supplementary file 4 [file Table S4 stream width constants.docx]

Table S4. Stream width constants.

| **catchment code** | **constant *a*** | **constant *b*** |
| --- | --- | --- |
| aufr | 0.0040 | 22.7 |
| augd | 0.0021 | 48.8 |
| ault | 0.0017 | 10.4 |
| aumf | 0.0001 | 18.61 |
| aums | -0.0011 | 15.7 |
| aunp | 0.0051 | 79.6 |
| ausj | 0.0009 | 26.1 |
| brmn | 0.0006 | 11.4 |
| brpr | 0.0000 | 11.4 |
| ilob | 0.0004 | 5.1 |
| usmh | 0.0003 | 78.6 |
| usnp | 0.0002 | 13.5 |
| ussc | 0.0003 | 13.5 |
| zaan | 0.0003 | 40.9 |
| zabt | 0.0009 | 6.8 |
| zade | 0.0008 | -48.5 |
| zadk | 0.0011 | 7.1 |
| zahe | 0.0003 | 14.1 |
| zahh | 0.0001 | 21.0 |
| zakk | 0.0006 | 5.6 |
| zamb | 0.0050 | 10.2 |
| zamk | 0.0020 | 5.2 |
| zao | 0.0017 | 6.3 |
| zaos | 0.0001 | 7.6 |
| zasd | 0.0003 | 20.2 |
| zat | 0.0000 | 22.8 |
| zaul | 0.0064 | 1.5 |
| zaw | 0.0003 | 6.7 |
