# Supplementary material for: HRRTLE (High Resolution Runoff and Transmission Loss Estimator): a novel tool for mapping connectivity of runoff in ephemeral stream networks to aid the siting of water harvesting structures
Source: Copernicus journal article supplement (doi:10.5194/hess-2024-97), 2024-04-12
Supplement: Supplementary file 5 [file Table S5 validation loss parameters.docx]

Table S5. The number of years of data used for the calibration and validation stages, together with the optimum transferral ratio parameter values used in the validation stage for each catchment.

|  |  |  | **validation** | **validation** | **validation** | **validation** |
| --- | --- | --- | --- | --- | --- | --- |
|  |  |  | **overland** | **overland** | **network** | **network** |
| **catchment code** | **# years calibration** | **# years validation** | **ko** | **po** | **kn** | **pn** |
| aufr | 20 | 19 | -5.50 | 5.50 | -5.50 | 5.50 |
| augd | 20 | 19 | -4.00 | 2.00 | -4.00 | 2.00 |
| ault | 19 | 18 | -4.00 | 3.50 | -4.00 | 3.50 |
| aumf | 19 | 18 | -0.05 | 0.05 | -0.05 | 0.05 |
| aums | 19 | 18 | -3.00 | 3.00 | -3.00 | 3.00 |
| aunp | 19 | 18 | -1.00 | 3.00 | -2.00 | 3.00 |
| ausj | 19 | 17 | -0.05 | 0.05 | -0.05 | 0.05 |
| brmn | 19 | 19 | -0.20 | 0.20 | -0.10 | 0.10 |
| brpr | 19 | 19 | -1.00 | 1.00 | -1.00 | 1.00 |
| ilob | 19 | 18 | -0.10 | 0.10 | -0.10 | 0.10 |
| usmh | 20 | 19 | -0.05 | 0.05 | -0.05 | 0.05 |
| usnp | 20 | 19 | -0.10 | 0.10 | -0.10 | 0.10 |
| ussc | 20 | 19 | -0.10 | 0.10 | -0.10 | 0.10 |
| zaan | 20 | 19 | -0.05 | 0.05 | -0.05 | 0.05 |
| zabt | 20 | 19 | -2.00 | 2.00 | -2.50 | 2.50 |
| zade | 20 | 19 | -0.27 | 0.27 | -0.27 | 0.27 |
| zadk | 20 | 19 | -2.00 | 2.00 | -2.00 | 2.00 |
| zahe | 20 | 19 | -0.40 | 2.00 | -0.40 | 2.00 |
| zahh | 20 | 19 | -0.50 | 0.50 | -0.50 | 0.50 |
| zakk | 20 | 19 | -0.50 | 0.50 | -0.50 | 0.50 |
| zamb | 20 | 19 | -0.10 | 0.10 | -0.10 | 0.10 |
| zamk | 20 | 19 | -0.10 | 0.10 | -0.10 | 0.10 |
| zao | 20 | 19 | -0.50 | 0.50 | -1.00 | 1.00 |
| zaos | 20 | 19 | -5.50 | 5.50 | -5.50 | 5.50 |
| zasd | 20 | 19 | -0.10 | 0.10 | -0.10 | 0.10 |
| zat | 20 | 19 | -1.00 | 1.00 | -1.00 | 1.00 |
| zaul | 20 | 19 | -0.30 | 1.00 | -0.50 | 1.00 |
| zaw | 20 | 19 | -0.30 | 1.00 | -0.30 | 1.00 |
